# Supplementary material for: Patchiness of forest landscape can predict species distribution better than abundance: the case of a forest-dwelling passerine, the short-toed treecreeper, in central Italy
Source: PubMed Central journal article supplement (PMC5018664; doi:10.7717/peerj.2398), 2016-09-08

**Fig. S1**

Artificial neural networks

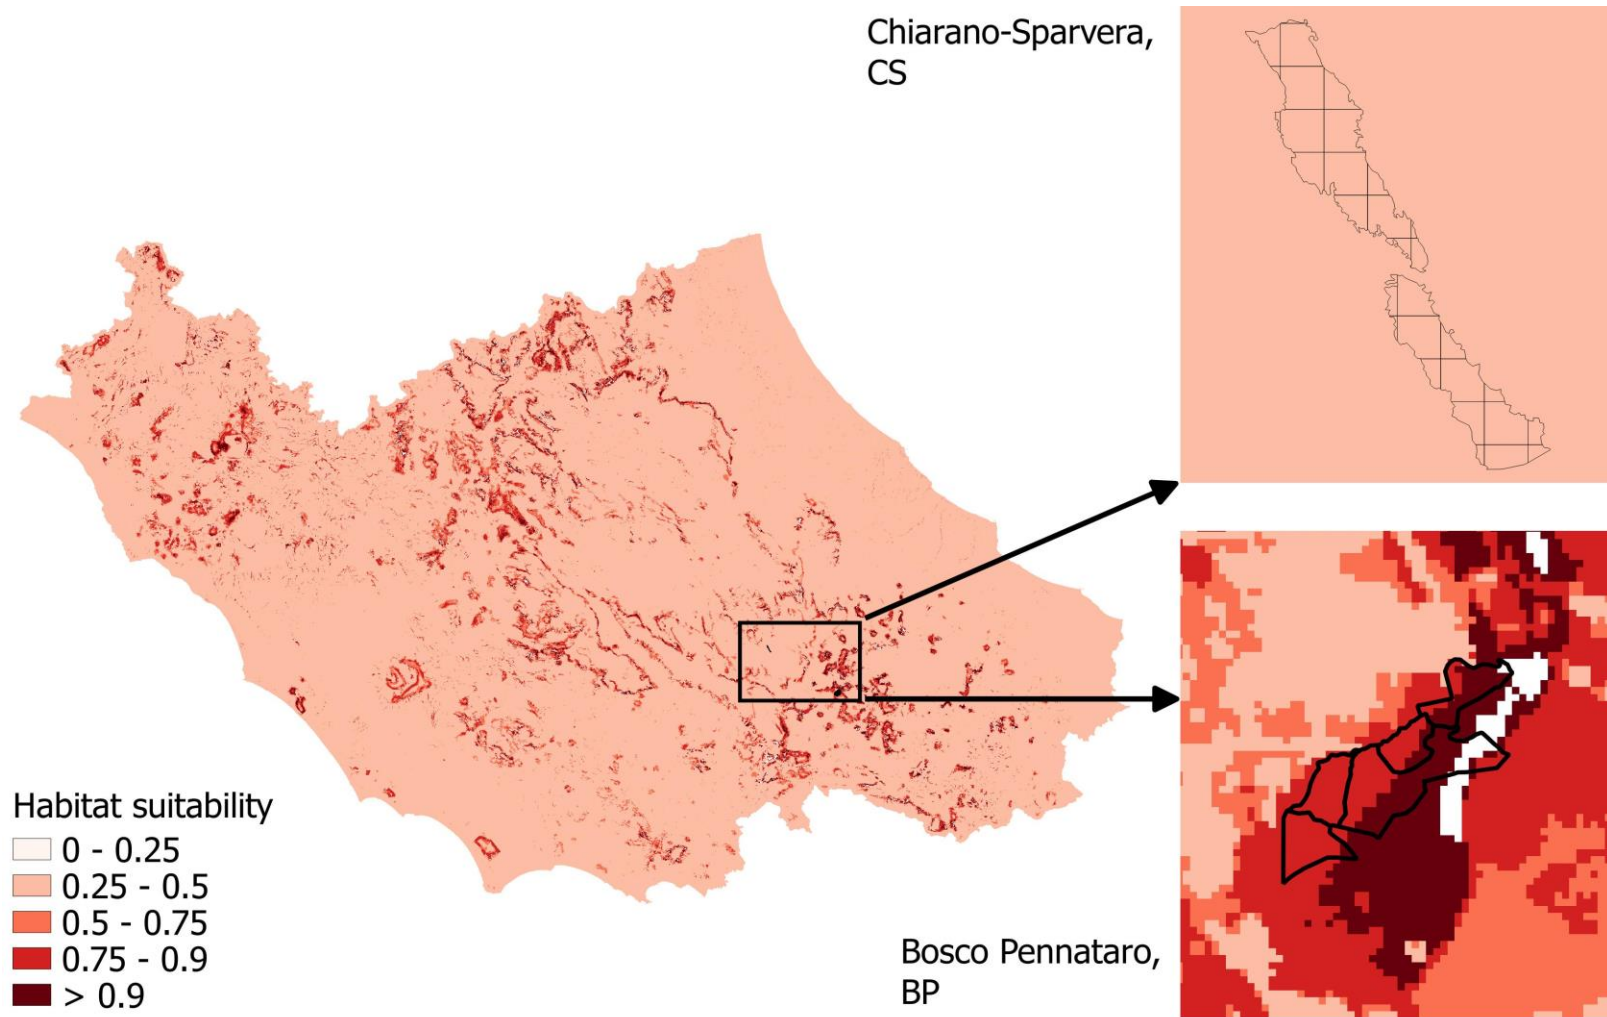

Classification tree analyses

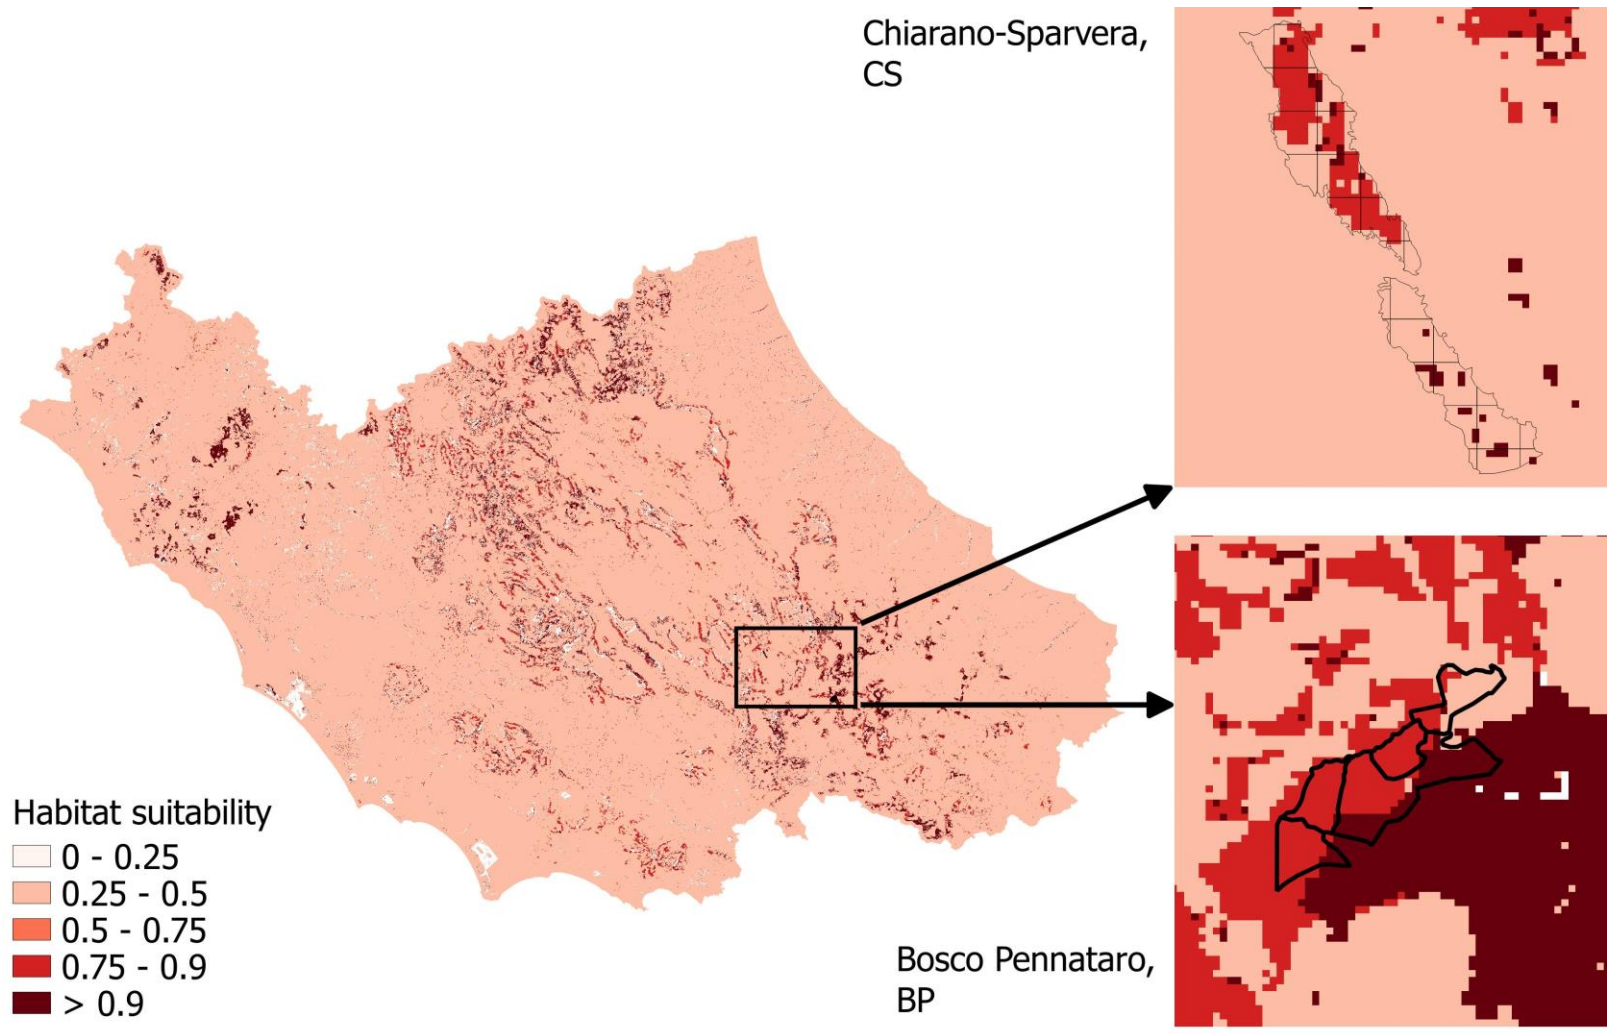

Flexible discriminant analyses

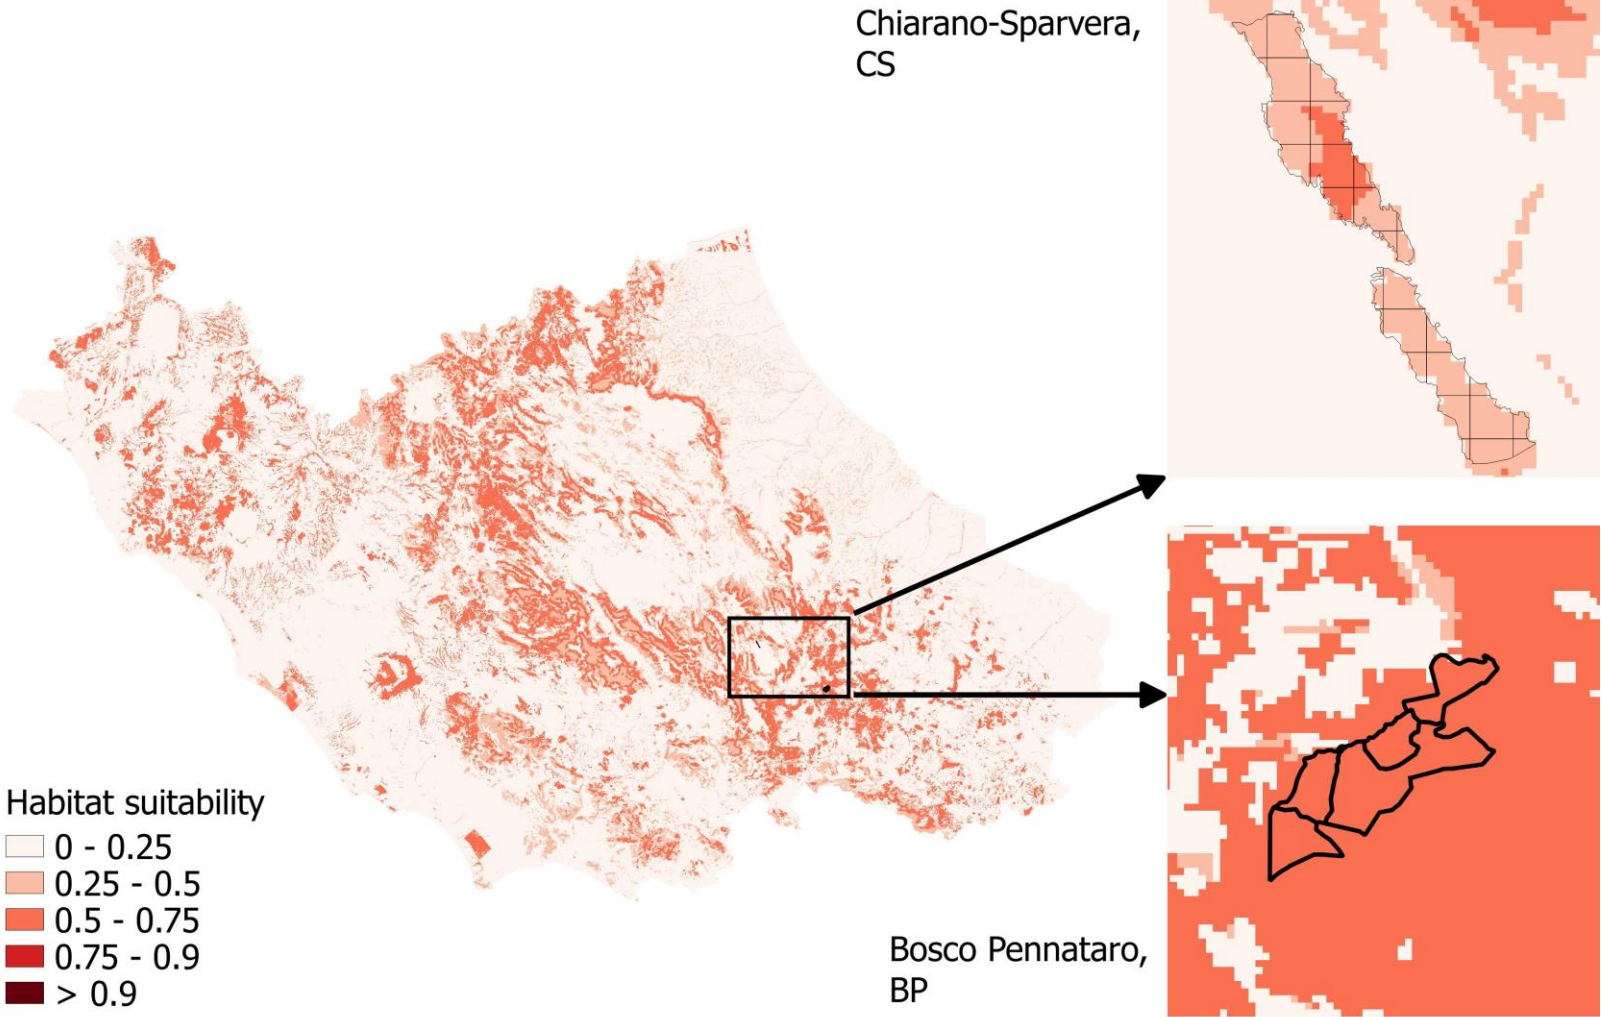

Generalized boosting models

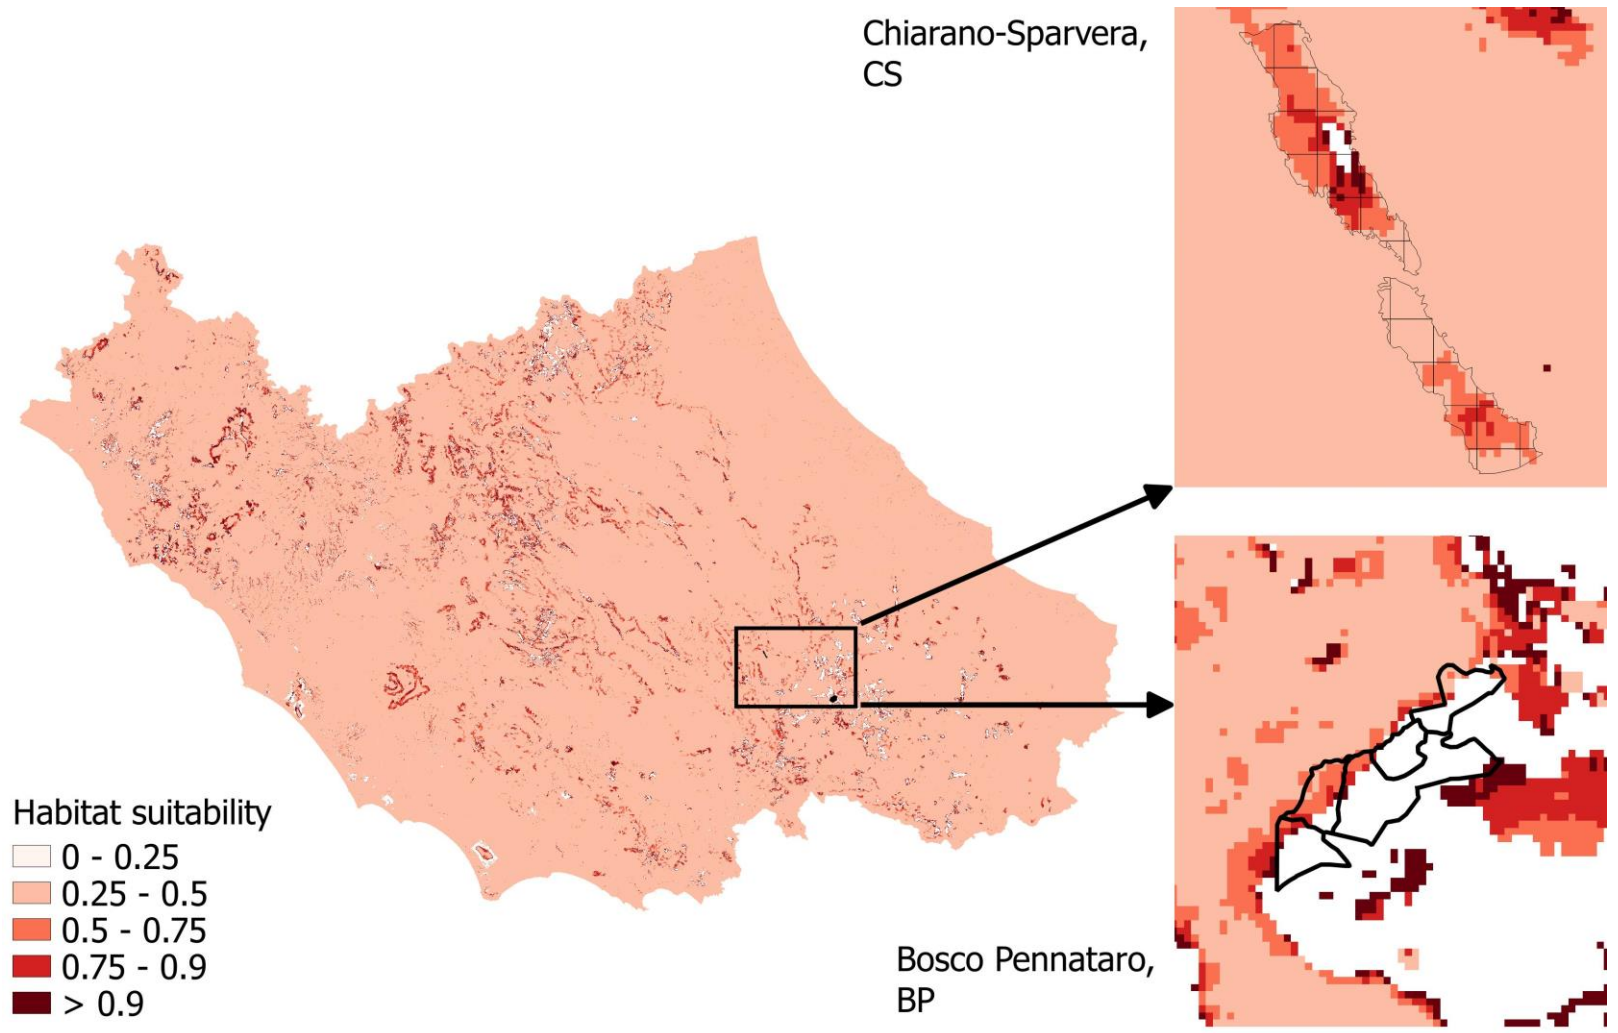

Generalized linear model

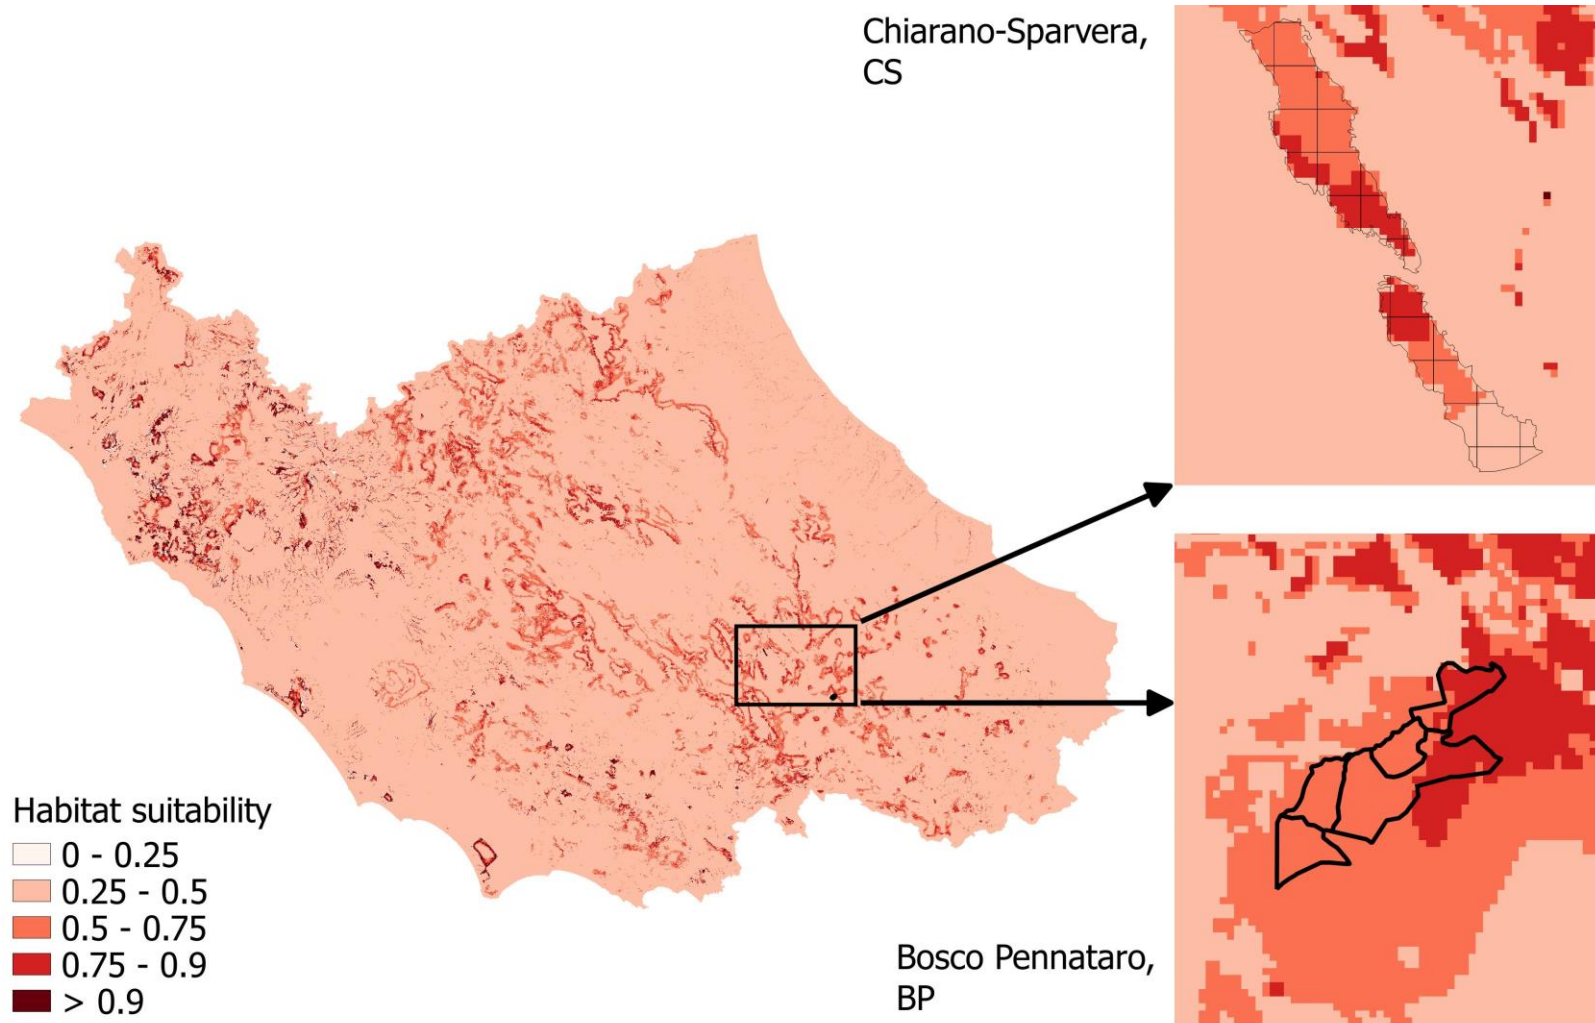

Multivariate additive regression splines

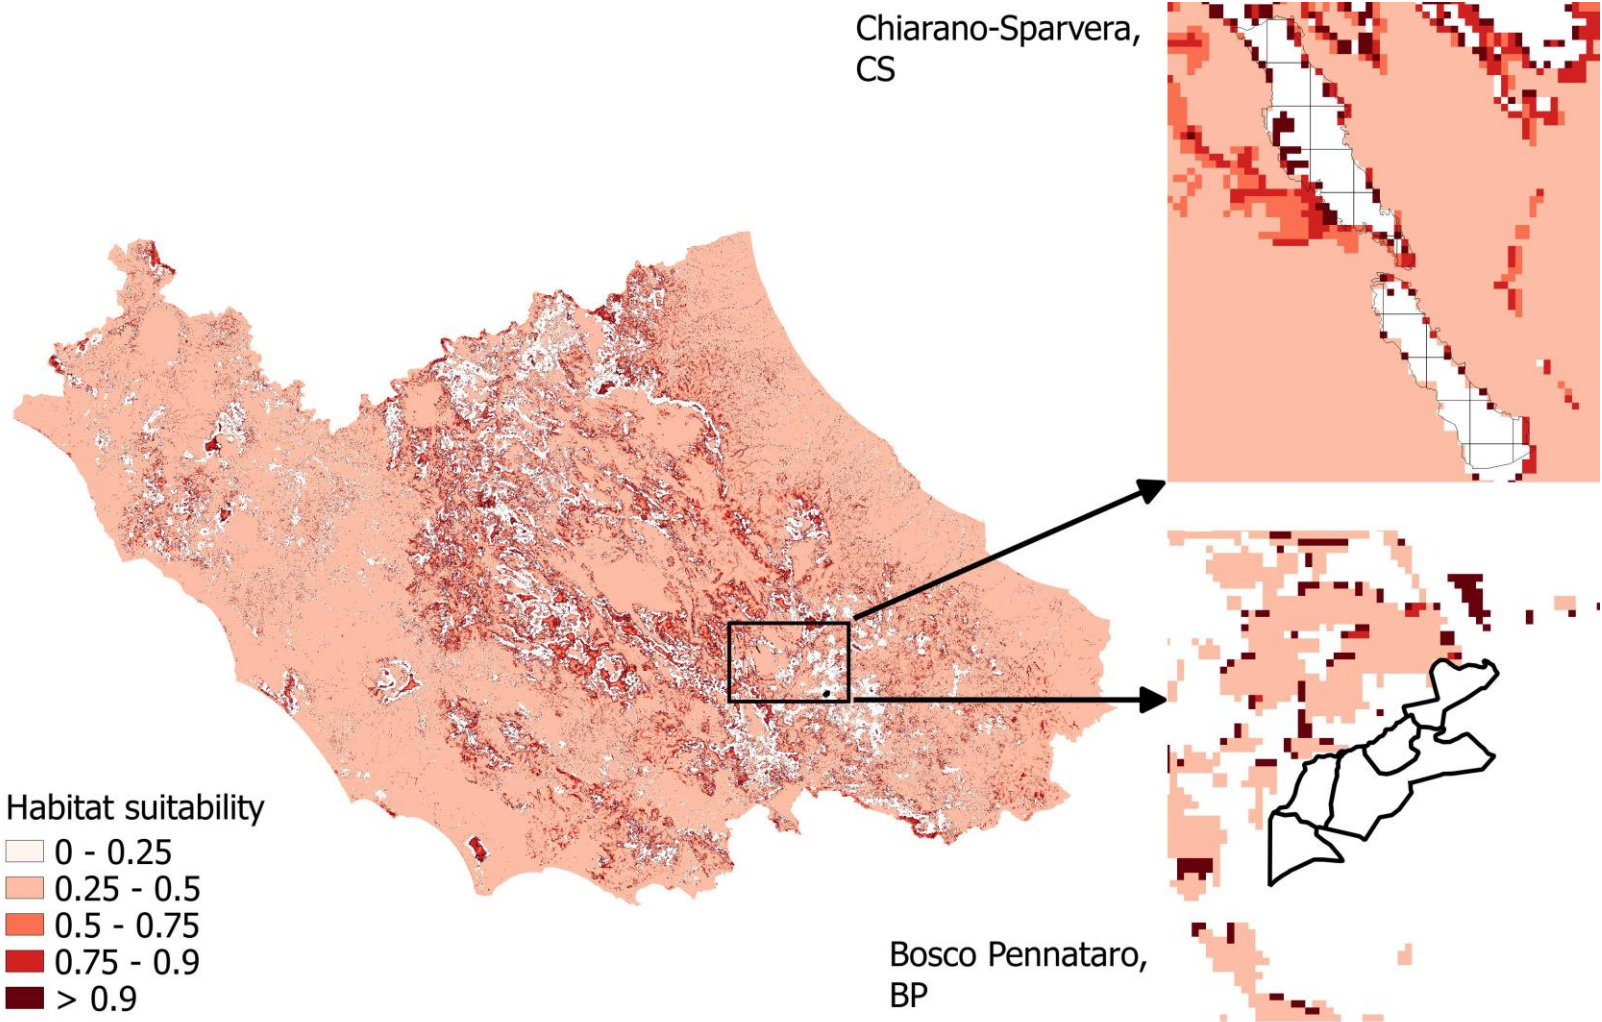

Maximum entropy

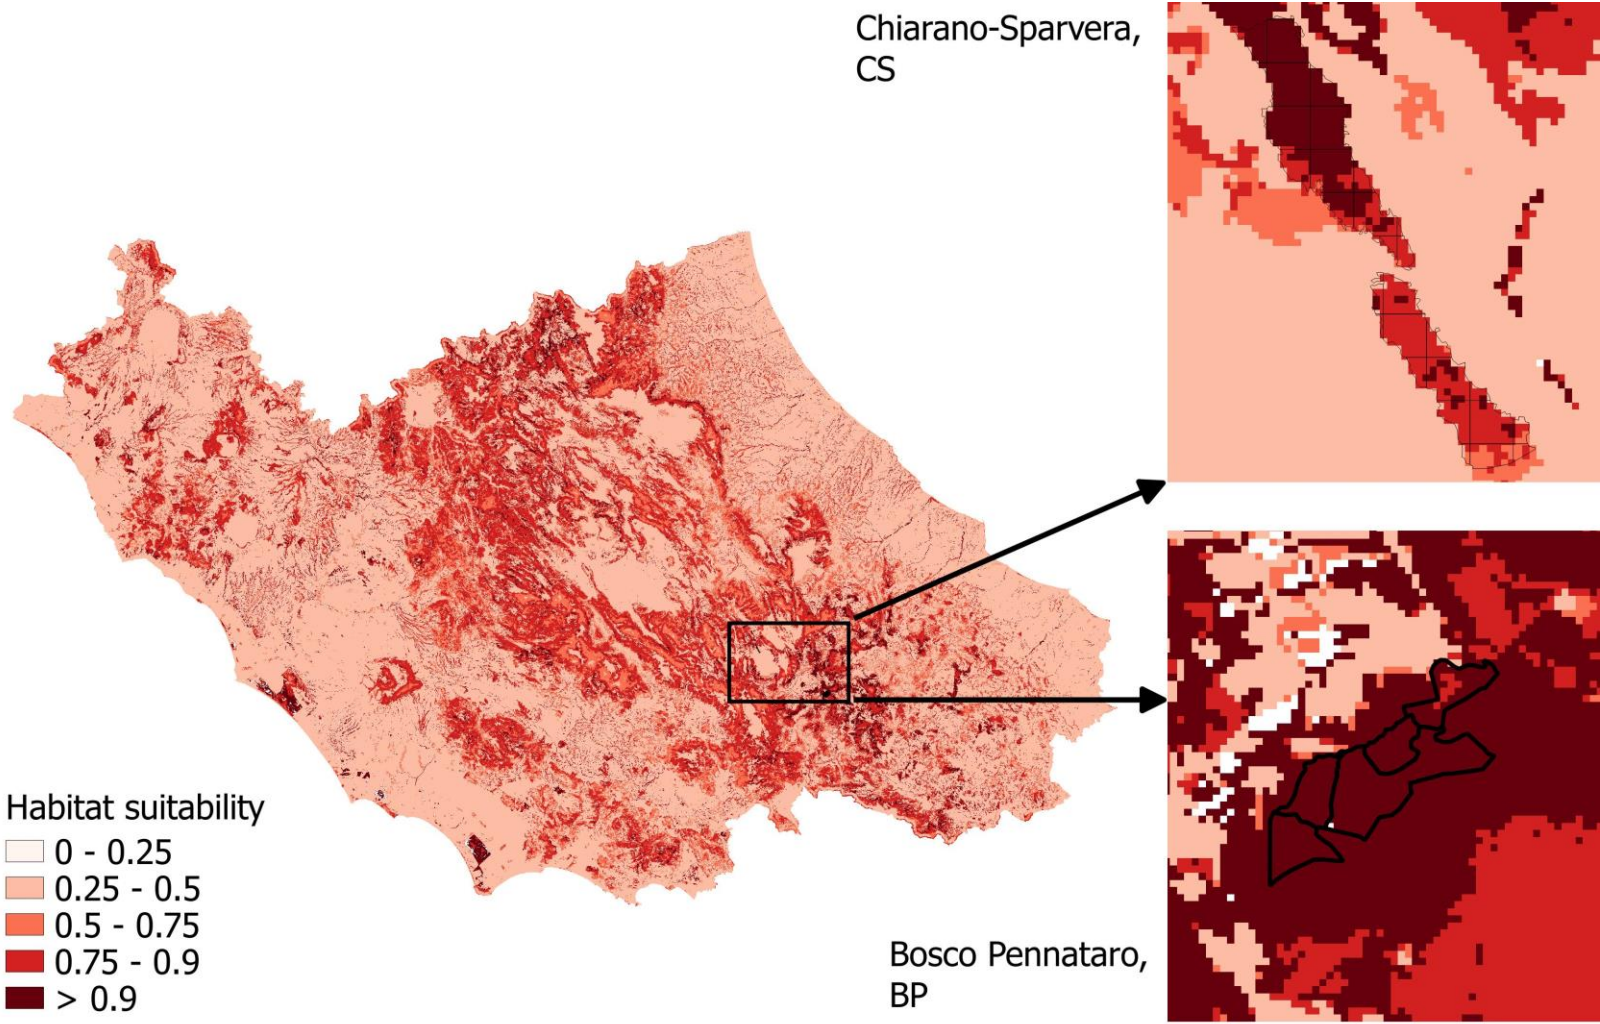

Random forests

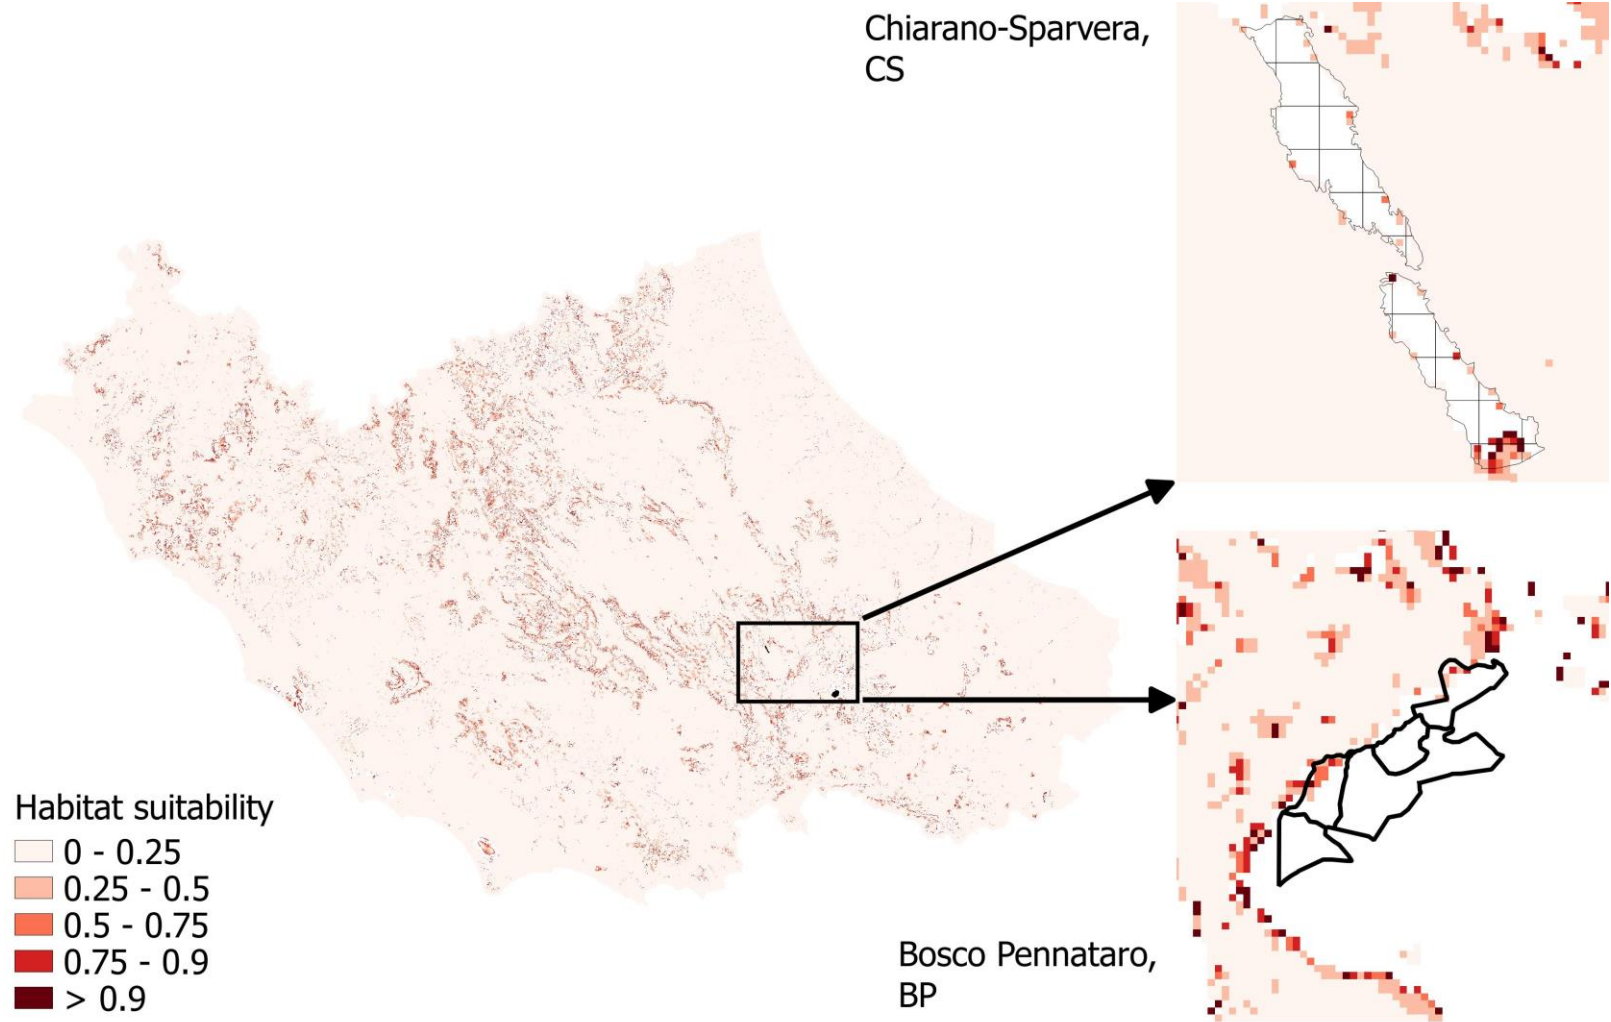

Supplement: peerj-04-2398-s003.pdf [file peerj-04-2398-s003.pdf]
