# Supplementary material for: Patchiness of forest landscape can predict species distribution better than abundance: the case of a forest-dwelling passerine, the short-toed treecreeper, in central Italy
Source: PubMed Central journal article supplement (PMC5018664; doi:10.7717/peerj.2398), 2016-09-08

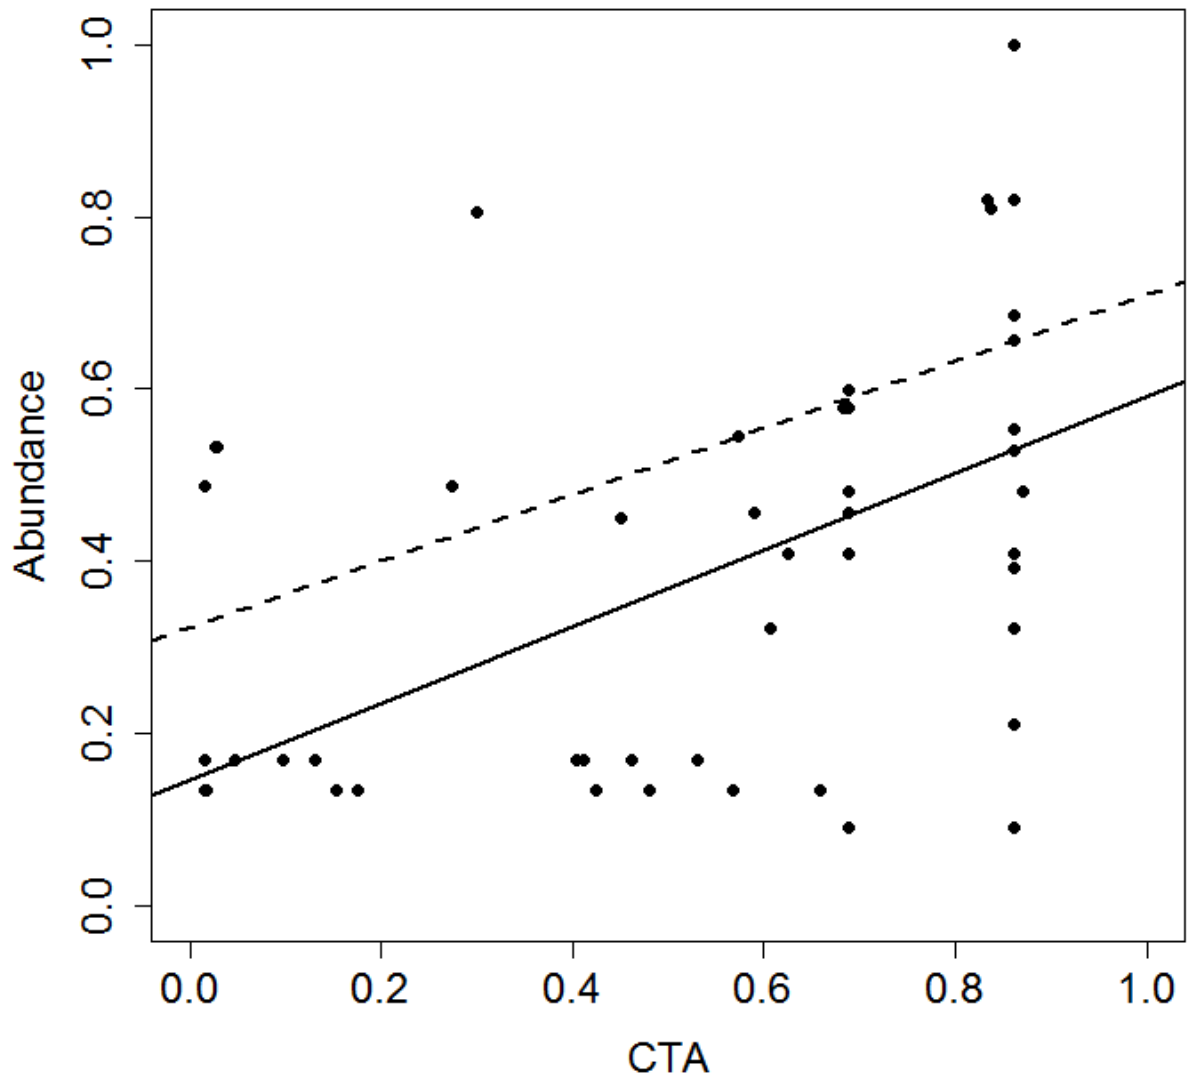

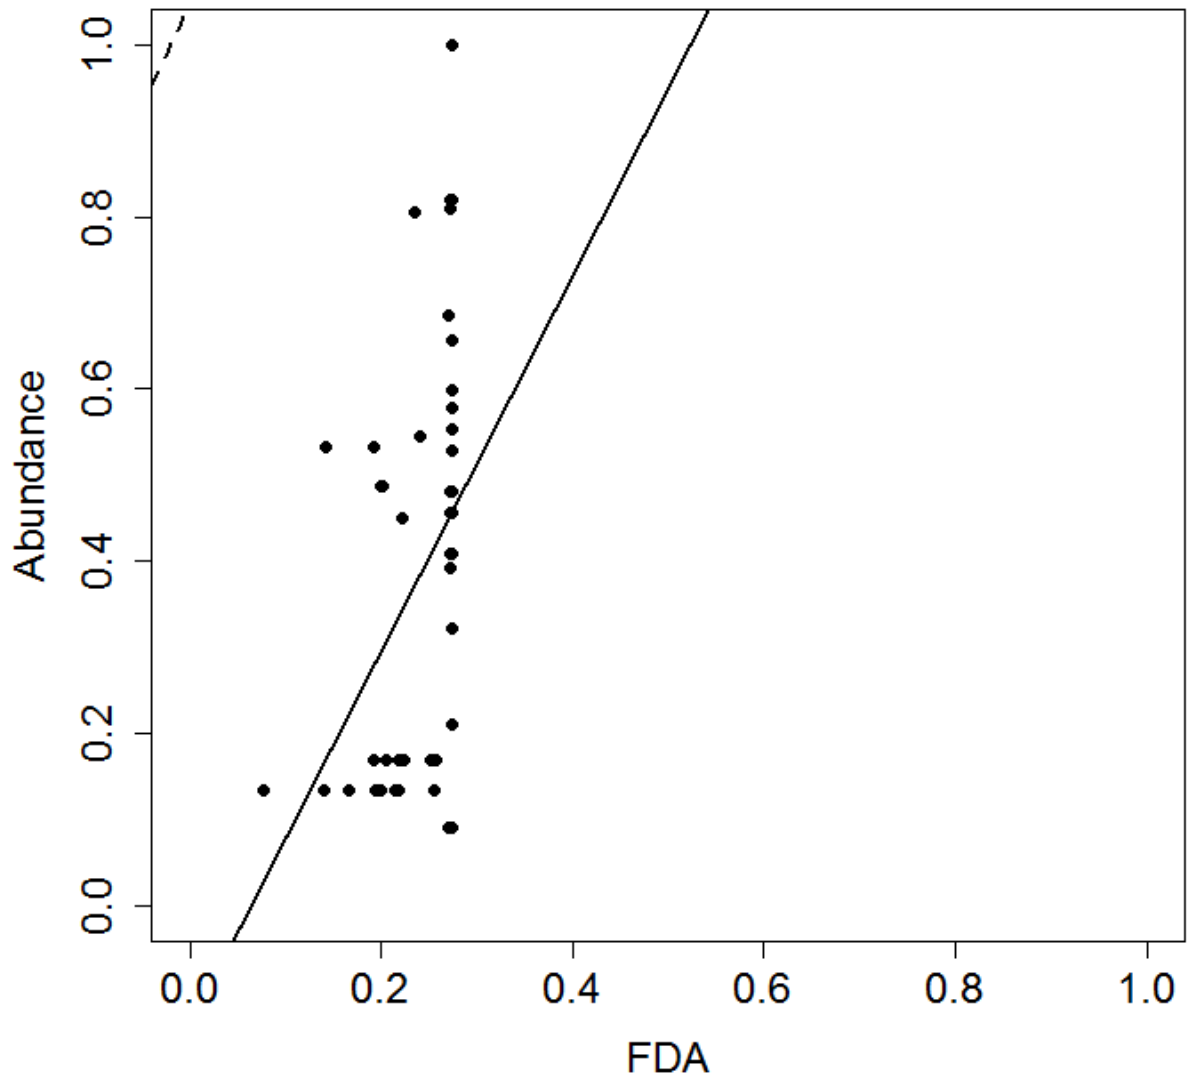



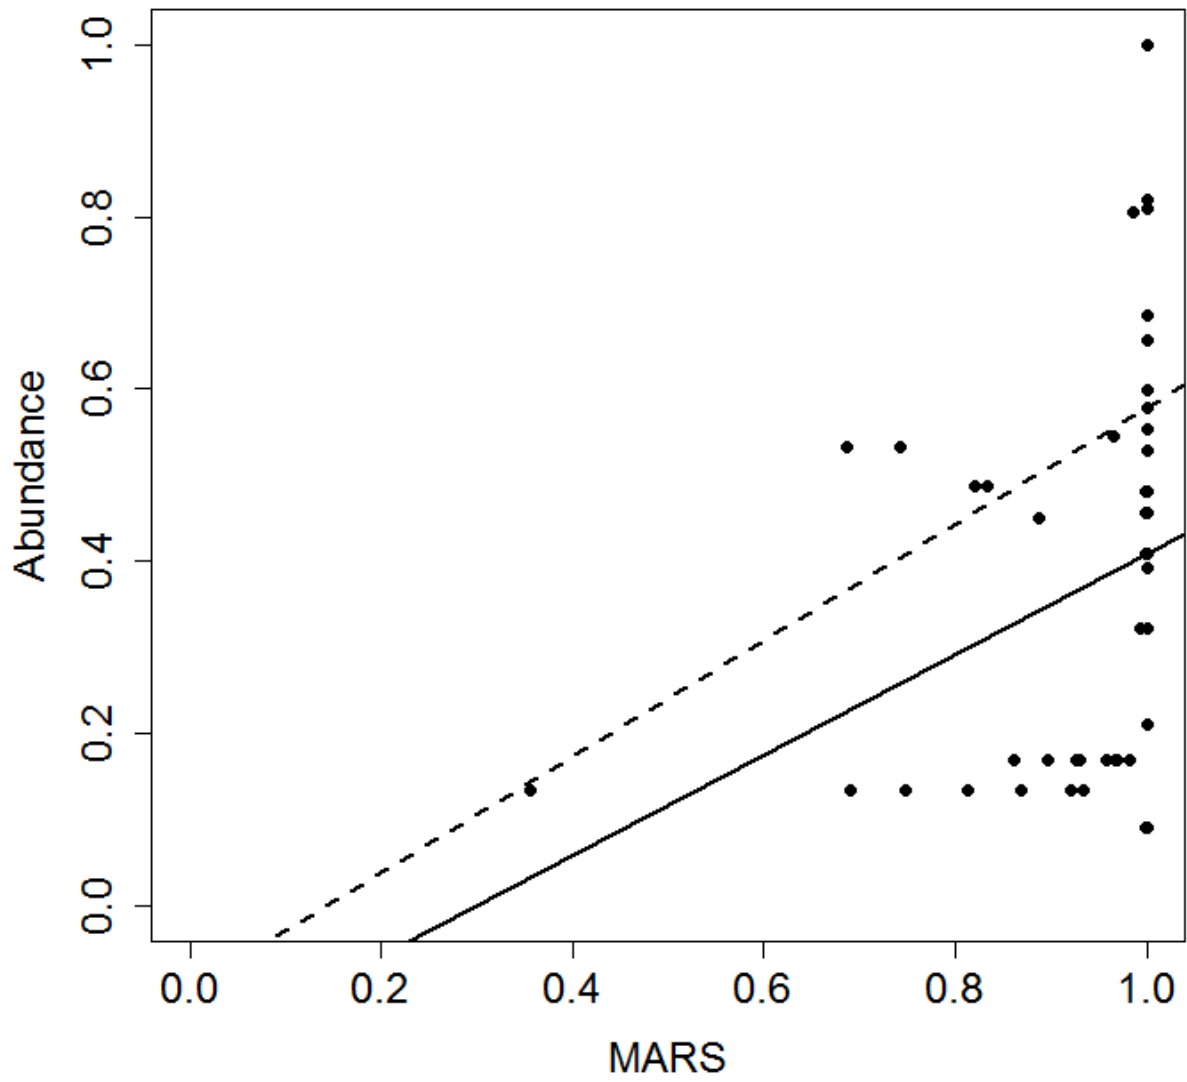

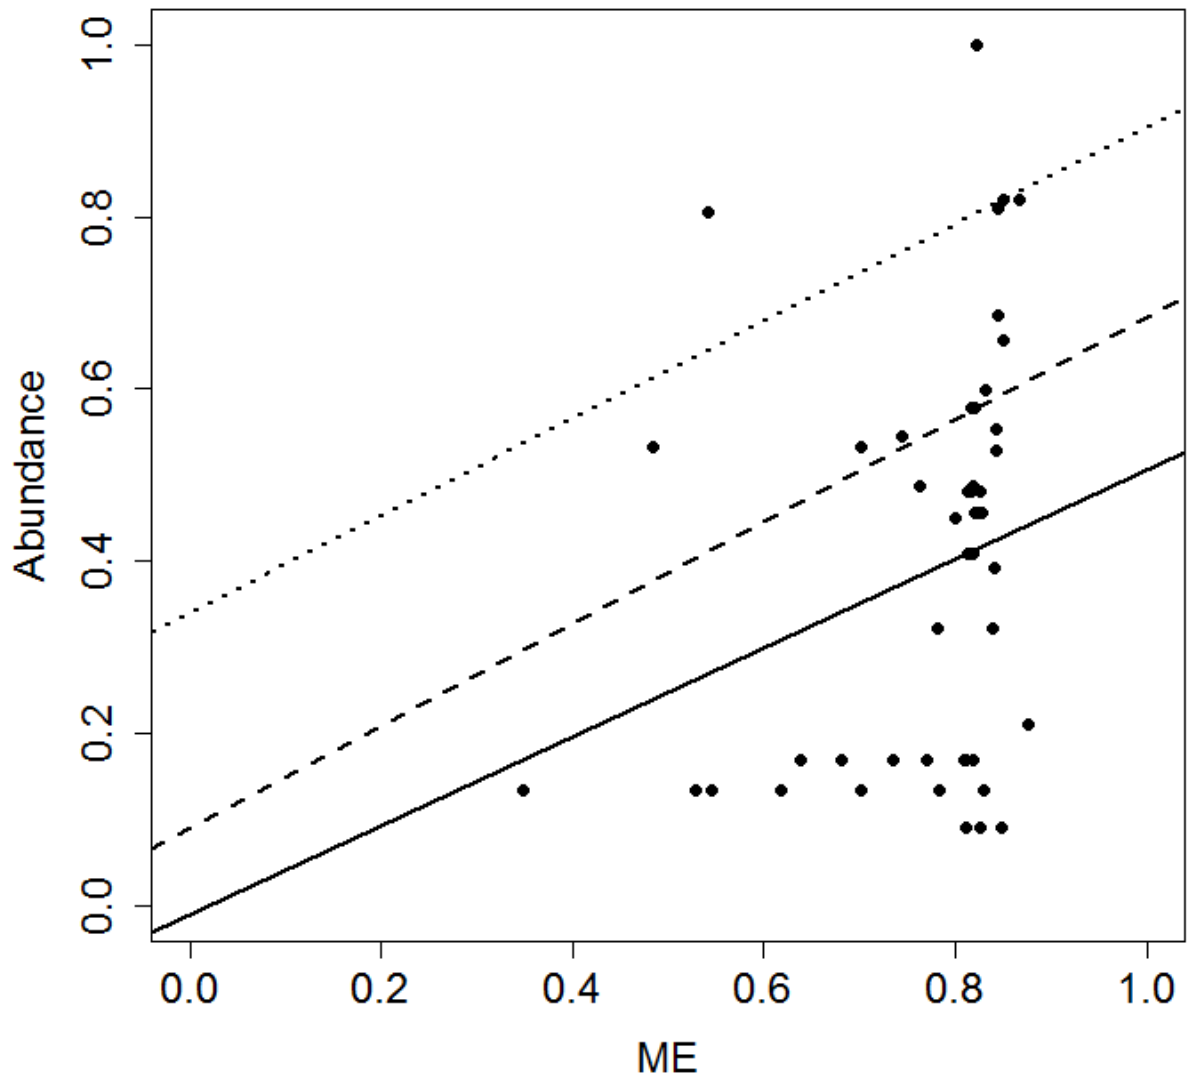

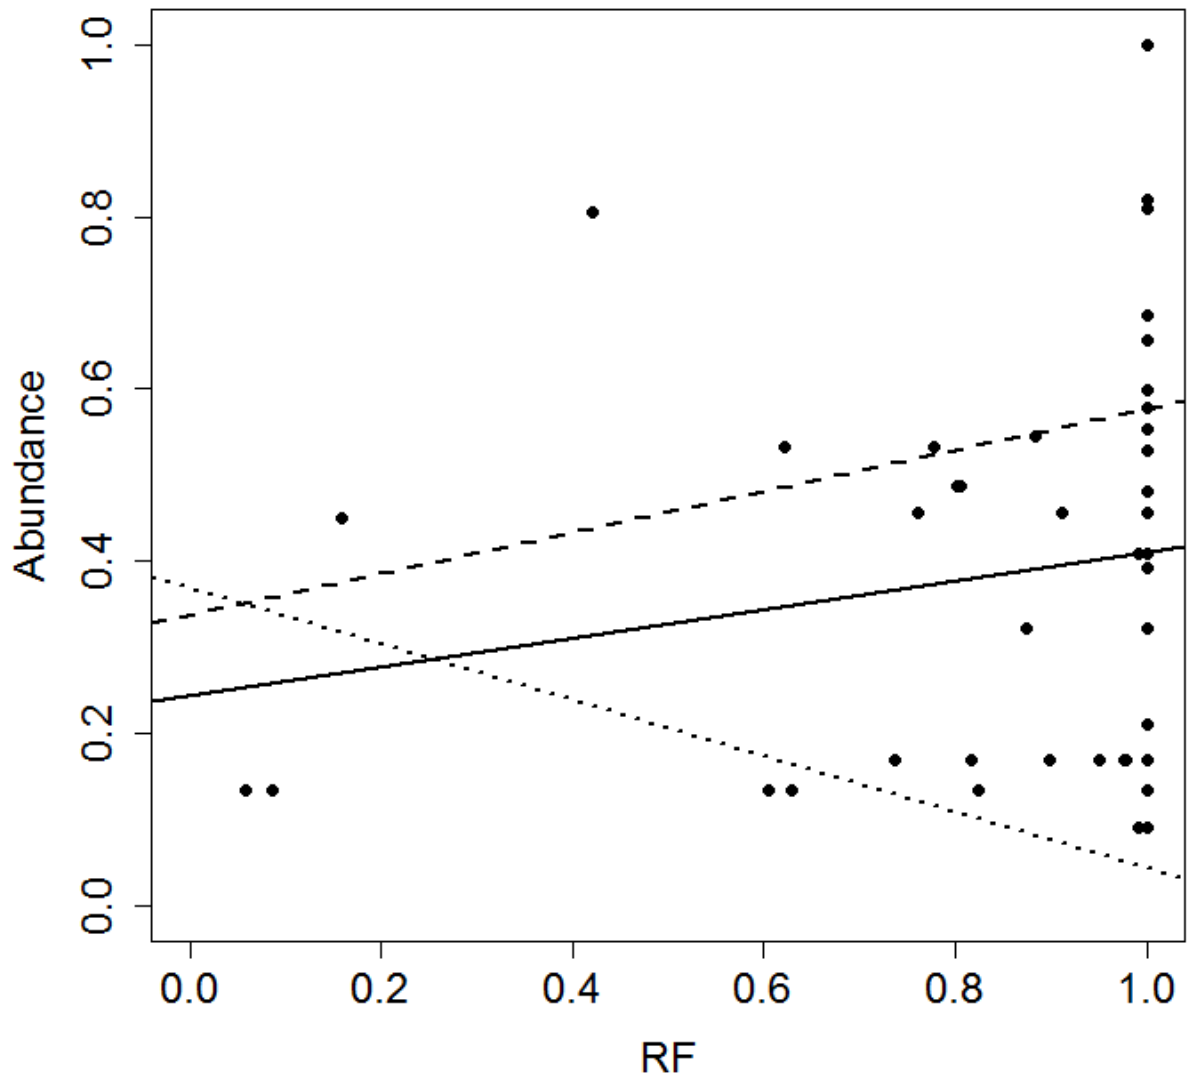

Supplement: peerj-04-2398-s004.pdf [file peerj-04-2398-s004.pdf]
